# Supplementary material
Source: Royal Society of Chemistry journal article supplement (doi:10.1039/d6ay00379f)
Supplement: d6ay00379f1.pdf [file d6ay00379f1.pdf]

1  
2  
3  
4  
5  
6  
7  
8  
9  
10  
11  
12  
13  
14  
15  
16  
17  
18  
19  
20

## Supplementary Material

### **A ratiometric fluorescence/colorimetric dual-response sensor based on fluorescent nanozymes and smartphone-assisted for accurate determination of glyphosate residues**

Xuhai Ding <sup>a</sup>, Ying Zhang <sup>a,b</sup>, Tao Bo <sup>a,b,c</sup>, Jinhua Zhang <sup>a,b,c</sup>, Wenyan Yan <sup>a,b</sup>, Baoqing Bai <sup>a,b,c\*</sup>, Yukun Yang <sup>a,b,c\*</sup>

<sup>a</sup> School of Life Science, Shanxi University, Taiyuan 030006, China

<sup>b</sup> Xinghuacun College of Shanxi University, Taiyuan 030006, China

<sup>c</sup> Shanxi Baijiu Ecological Brewing Technology Innovation Center, Taiyuan 030006, China

\* Corresponding authors: E-mail address: baibaoqing@sxu.edu.cn (B. Bai); yangyukun@sxu.edu.cn (Y. Yang).

21

22

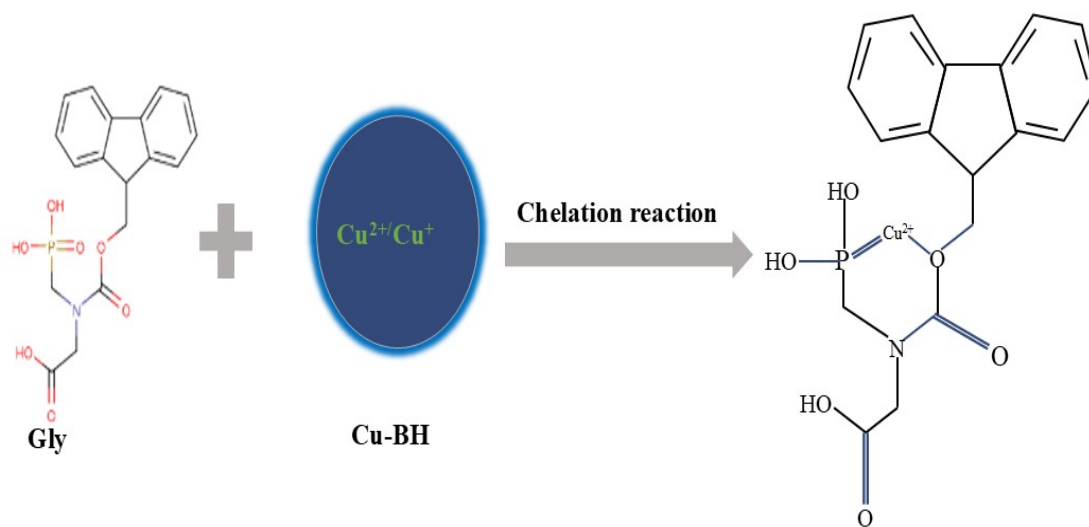

23

24

25

Fig. S1. Reaction Mechanism of Nanozymes with Glyphosate

26

27

28

29

30

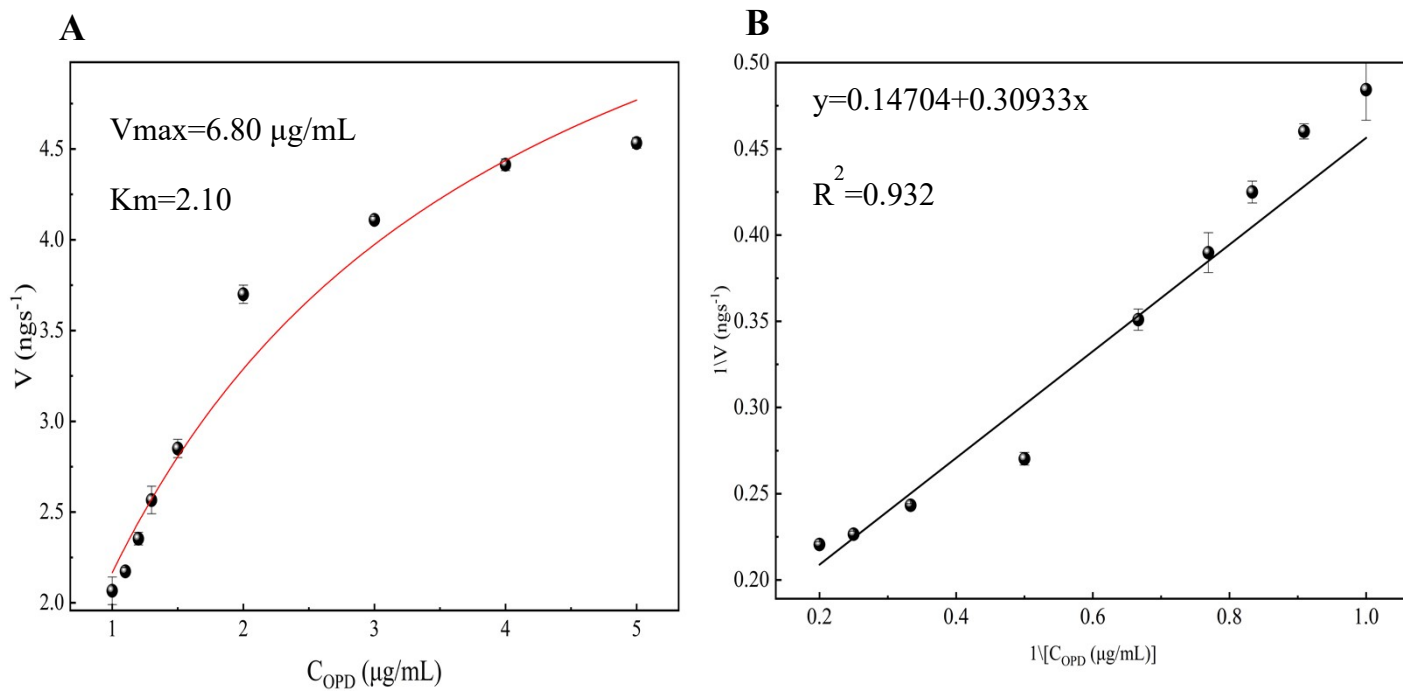

41 Fig.S2. Steady-state kinetic assays of Cu-BH. Michaelis-Menten (A) and

42 Lineweaver-Burk plots (B) for the OPD substrate.

43

44

45

46

47

48

49

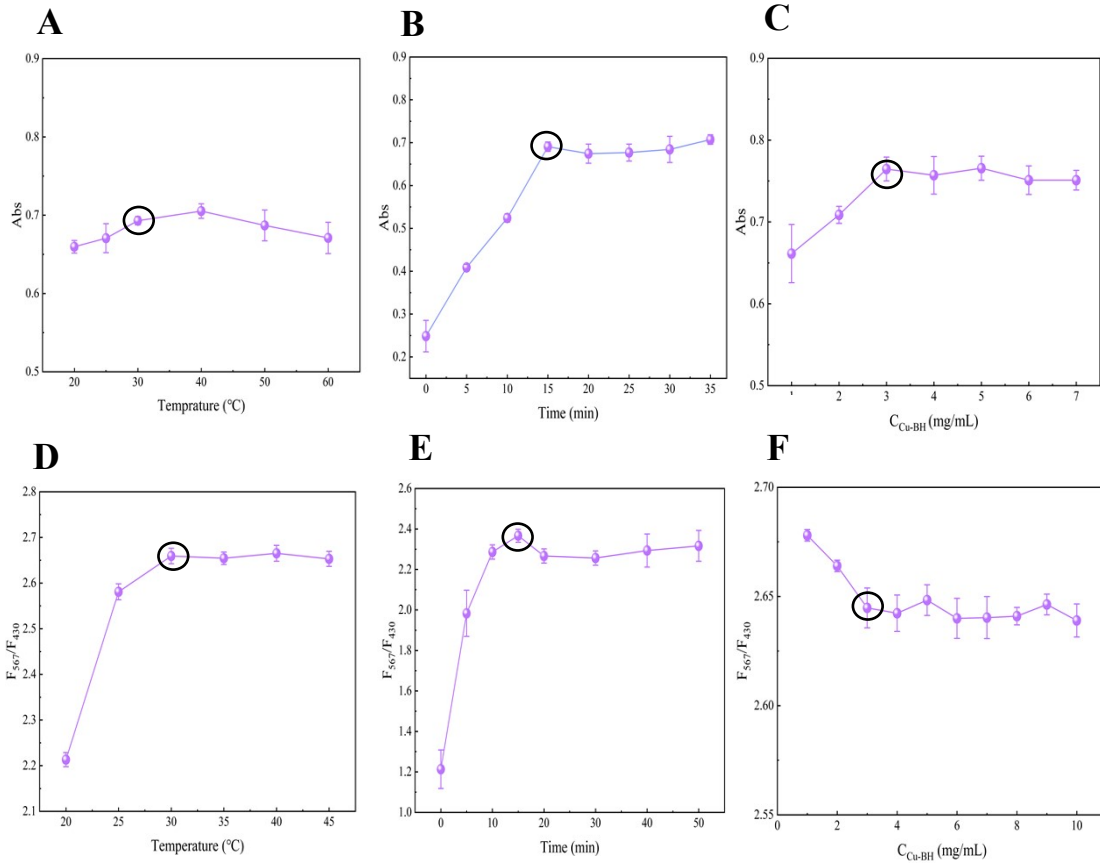

50

51

52 Fig.S3. Effect of (A) reaction temperature, (B) incubation time, and (C)

53 Cu-BH concentration on  $A_{416}$ . (D) Effect of temperature, (E) incubation

54 time, (F) Cu-BH concentration on on the  $F_{567}/F_{430}$

55

56

57

58

59

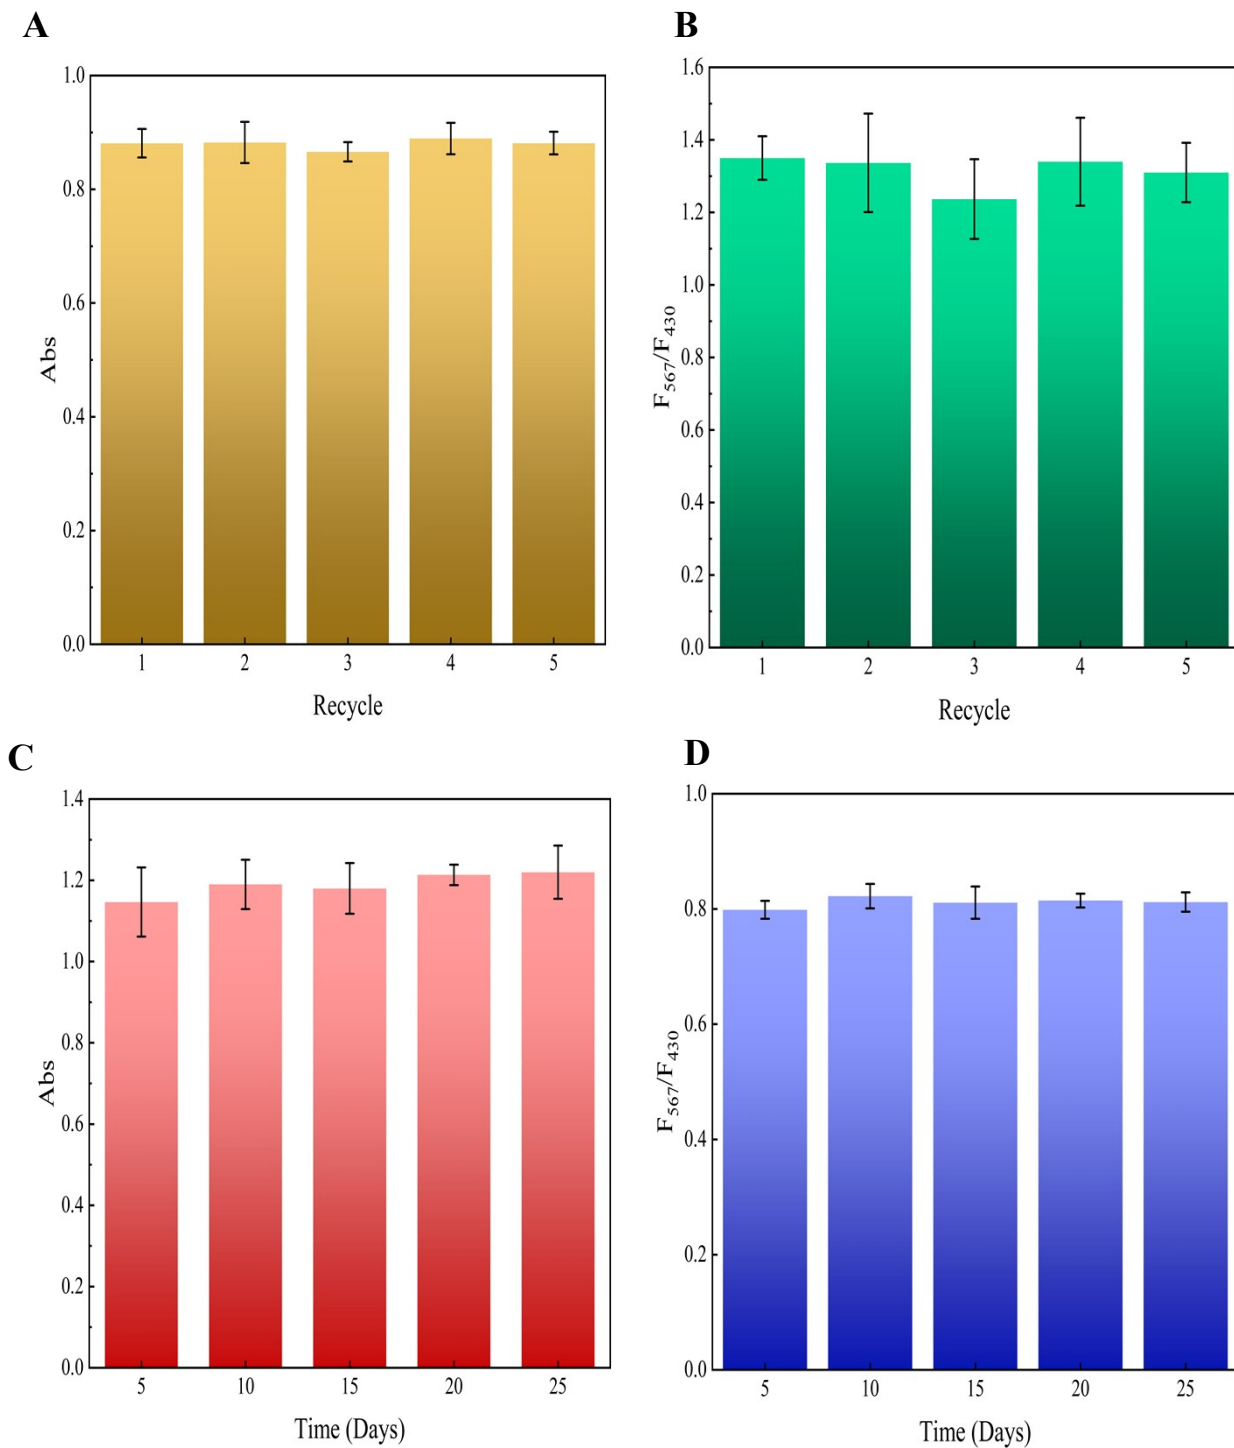

62 Fig.S4. (A) Colorimetric response repeatability; (B) Fluorescence response  
63 repeatability; (C) Colorimetric response stability;(D) Fluorescence  
64 response stability of Cu-BH/OPD biosensors.

65

66

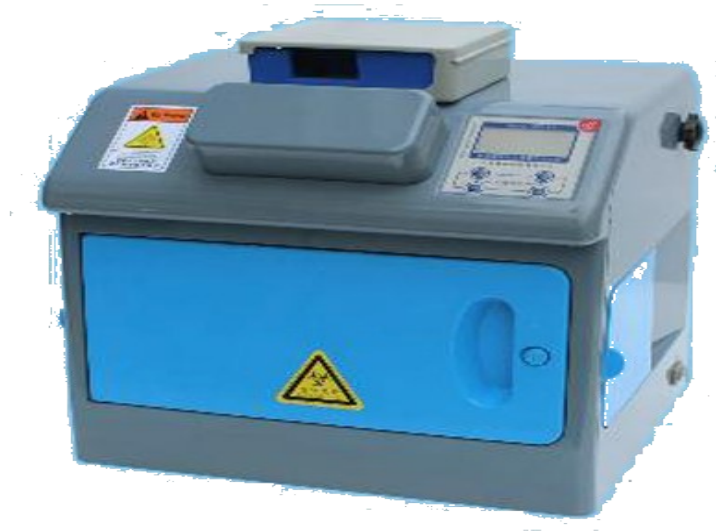

67

68

69

Fig. S5. Portable Detection Device

70
